# Supplementary material
Source: PubMed Central journal article supplement (PMC3838757)
Supplement: mmc1.pdf [file mmc1.pdf]

**Supporting Information**  
**Sarangapani *et al.* 2013BIOPHYSJ303123**

**The limitations of an exclusively colloidal view of  
protein solution hydrodynamics and rheology**

Prasad S. Sarangapani <sup>†</sup>, Steven D. Hudson<sup>§</sup>,  
Kalman B. Migler<sup>§</sup>, and Jai A. Pathak <sup>†\*</sup>

<sup>†</sup>Formulation Sciences Department: Drug Product Manufacturing Group, MedImmune,  
One MedImmune Way,  
Gaithersburg, MD 20878 USA

<sup>§</sup>Materials Science and Engineering Division,  
National Institute of Standards and Technology,  
100 Bureau Drive,  
Gaithersburg, MD 20899-8544 USA

## Methods

**Size-exclusion chromatography multi-angle light scattering (SEC-MALS):** SEC-MALS was performed using a TSK gel G3000 SW 7.8 mm×30 cm, 5µm (TOSOH Bioscience) column connected to an Agilent 1100 series equipped with a Diode Array Detector (DAD, Agilent 1100 series) and a refractive index detector (RID, Agilent 1100 series). Agilent HPLC system is connected to a Multi Angle Light Scattering (MALS) detector (DAWN EOS, Wyatt Technology, Santa Barbara, CA) equipped with a laser source 690 nm and 18 detectors at angles between 22.5 ° and 147 °. All detectors were normalized based on a 90 ° angle using a 2 mg/mL BSA standard (Pierce standard) and calibrated with Toluene. DAD, RID and MALS signals were imported and processed in the ASTRA V software (Wyatt Technology, Santa Barbara, CA). Mass average molar masses of all species were determined using the Zimm equation:

$$Kc/R_{\theta} = 1/M_w (1 + q^2 R_g^2 / 3) + 2B_{22}c + \dots$$

$$K = 4\pi^2 n_0^2 (dn/dc)^2 / N_A \lambda^4$$

$n_0$ : refractive index,

$dn/dc$ : refractive index increment (0.185 mL/g),

$c$ : BSA concentration ( $B_{22}c$  term is negligible as the samples are dilute),

$B_{22}$ : second virial coefficient,

$N_A$ : Avogadro's number,

$\lambda$ : wavelength of the incident light,

$R_g$ : radius of gyration,

$q$ : scattering wave-vector.

## Figures and Tables

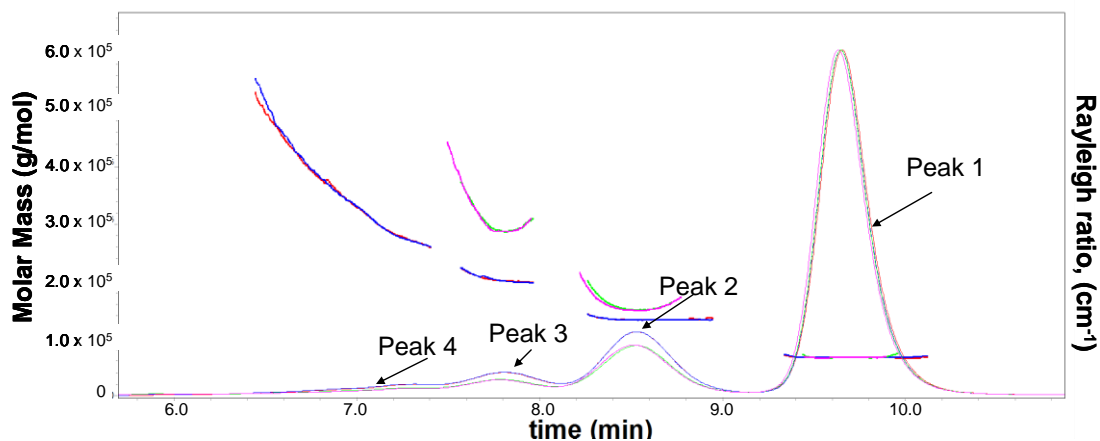

FIGURE S1: Size-exclusion chromatography multi-angle light scattering (SEC MALS) measurements for BSA at 10 mg/mL and pH = 4.0 (red), 5.0 (blue), 6.0 (light blue) and 7.4 (orange). The elution peak at 9.5 minutes from the SEC chromatograms in Fig. 1 in the text as the corresponding molar mass  $M_w = 67$  kDa approximately equals BSA monomer  $M_w^1$ . Molar masses corresponding to peaks 1 through 4 are shown in Table S1 below.

Table S1: Molar Masses of BSA fractions obtained from SEC MALS

| pH  | Peak 1<br>(kDa) | Peak 2<br>(kDa) | Peak 3<br>(kDa) | Peak 4<br>(kDa) |
|-----|-----------------|-----------------|-----------------|-----------------|
| 4.0 | 67              | 134             | 204             | 328 (528-250)   |
| 5.0 | 67              | 133             | 204             | 331 (510-250)   |
| 6.0 | 67              | 162             | 305 (380-280)   | -               |
| 7.4 | 67              | 157             | 316 (420-300)   | -               |

TABLE S1: Molar masses corresponding to eluted peaks 1 through 4 in Fig. S1.

Table S2: Size-exclusion chromatography data for Bovine Serum Albumin

| <b>pH</b> | <b>Monomer (%)</b> | <b>Clusters (%)</b> |
|-----------|--------------------|---------------------|
| 3.0       | 70                 | 30                  |
| 4.0       | 76                 | 24                  |
| 5.0       | 70                 | 30                  |
| 6.0       | 75                 | 25                  |
| 7.4       | 75                 | 25                  |

TABLE S2: SEC data summary for Fig. 2 in the text: percentage of monomer and higher-order soluble clusters in a 10 mg/mL BSA solution from single injections (250  $\mu$ g)

Table S3: Prior studies of Bovine Serum Albumin solution rheology

| <b>Authors</b>                                                         | <b>Concentration/Volume Fraction Range</b> | <b>pH range</b>  |
|------------------------------------------------------------------------|--------------------------------------------|------------------|
| Present work                                                           | 2 mg/mL - 400 mg/mL                        | 3.0-7.4          |
| Sharma A. Jaishankar, Y.C. Wang, G.H. McKinley (2)                     | 10 mg/mL - 250 mg/mL                       | 7.4              |
| Brownsey, G.J., T.R. Noel, R. Parker, S.G. Ring (3)                    | 200 mg/mL - 500 mg/mL                      | 5.4              |
| Tanford, C. and J. G. Buzzell. (4)                                     | 40 mg/mL                                   | 4.3-10.5         |
| Tanford, C, J.G. Buzzell, D.G. Rands, and S.A. Swanson (5)             | 1-15 mg/mL                                 | 2.0-10.5         |
| Saluja, A. and D.S. Kalonia (6)                                        | 10 mg/mL - 200 mg/mL                       | 2.0-9.0          |
| Gaigalas, A.K., V. Reipa, J.B. Hubbard, J. Edwards, and J. Douglas (7) | Volume Fraction: 0-0.2                     | 4.0-6.0          |
| Monkos, K. (8)                                                         | 17.6 mg/mL - 363.4 mg/mL                   | 5.2              |
| Sun, S.F. (9)                                                          | ~1 mg/mL                                   | 2.0-11.7         |
| Lee, J. and Tripathi, A. (10)                                          | 20 mg/mL - 80 mg/mL                        | 8.0              |
| Heinen, M., F. Zanini, F. Roosen-Runge, D. Fedunova, and F. Zhang (11) | Up to 500 mg/mL                            | 7.0 (unbuffered) |

|                                                                               |                                  |                |
|-------------------------------------------------------------------------------|----------------------------------|----------------|
| Giordano, R., G. Maisano, F. Mallamace,<br>N. Micali, and F. Wanderlingh (12) | 0.1-1 mg/mL                      | 5.2-11.8       |
| Jachimska, B., M. Wasilewska, and Z.<br>Adamczyk. (13)                        | Volume Fraction: 0.001-<br>0.008 | 3.0-9.5        |
| Curvale, R. (14)                                                              | 1.25-20 mg/mL                    | 2.4-10.0       |
| Yadav, S., S.J. Shire, and D.S. Kalonia<br>(15)                               | 25-300 mg/mL                     | 4-7            |
| Oates, K.M.N., W.E. Krause, R.L. Jones,<br>and R.H. Colby (16)                | 11-44 mg/mL                      | 5-7.4          |
| Bloomfield, V. (17)                                                           | 1.6 mg/mL                        | 3.6            |
| Bowen, W.R. and P.M. Williams (18)                                            | 0-20 mg/mL                       | 6.0, 8.0, 10.0 |
| Chikazumi, N. and Ohta, T. (19)                                               | 1 mg/mL                          | 2.0            |
| Ikeda, S. and Nishinari, K. (20)                                              | 10 mg/mL                         | 7.0            |

TABLE S3: Comparison of experimental design space of this work and previous BSA solution rheology investigations. The volume fraction range is shown instead of protein concentration for some references, as the authors did not define protein volume fraction (7, 13), except for ref. (11).

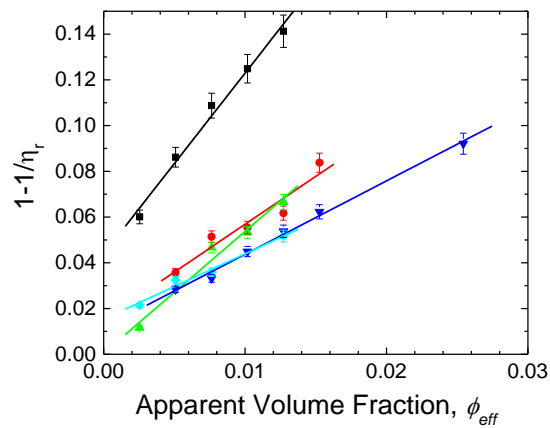

FIGURE S2: Intrinsic viscosity determination for BSA solutions at pH = 3.0 (squares), 4.0 (circles), 5.0 (triangles), 6.0 (inverted triangles), and 7.4 (diamonds) using volume fraction defined in Eq. 3 in text. The uncertainty in viscosity (one standard deviation) was determined from five different measurements with fresh sample loadings. In some cases, the uncertainties are smaller than the symbol sizes.

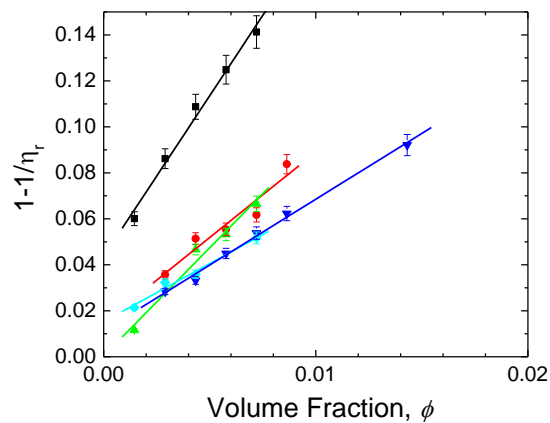

FIGURE S3: Intrinsic viscosity determination for BSA solutions at pH = 3.0 (squares), 4.0 (circles), 5.0 (triangles), 6.0 (inverted triangles), and 7.4 (diamonds) using volume fraction defined in Eq. (4) in text, which accounts for protein surface hydration. The same uncertainty in viscosity (standard deviation) applies here as in Fig. S2. In some cases, the uncertainties are smaller than the symbol sizes.

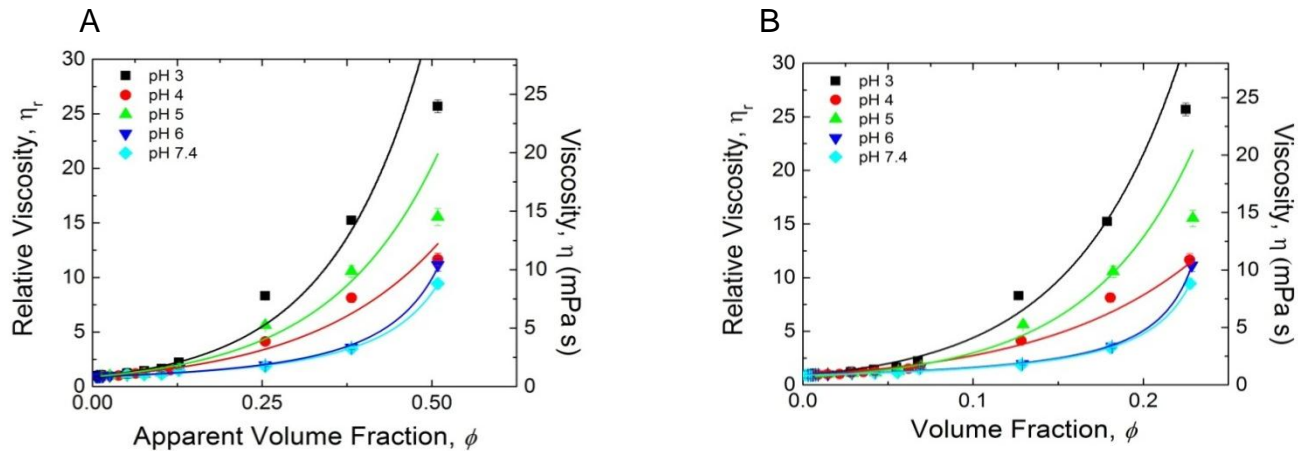

FIGURE S4: (A) Relative viscosity  $\eta_R$  vs. volume fraction,  $\phi$  (calculated using Eq. 3) for BSA concentration,  $c_{BSA}$ ,  $2 \text{ mg/mL} \leq c_{BSA} \leq 12 \text{ mg/mL}$  at pH = 3.0 (squares), 4.0 (circles), 5.0 (triangles), 6.0 (inverted triangles) and 7.4 (diamonds). (B) Same data and symbol keys as in Fig. S4(A). Curves are non-linear regression fits to the Krieger-Dougherty model (Eq. 5) with *all* parameters freely floating with  $\phi$  defined by Eq. 3 in (A) and Eq. 4 in (B), respectively.

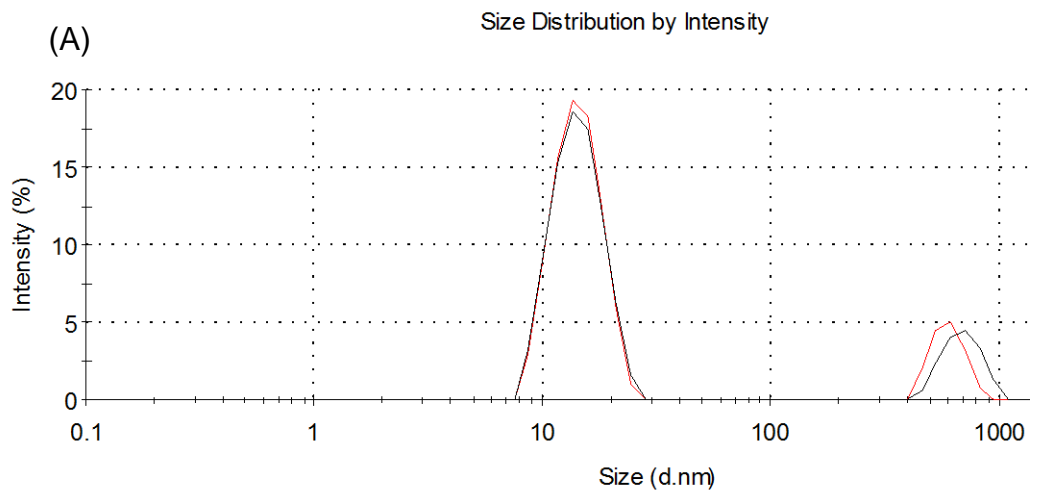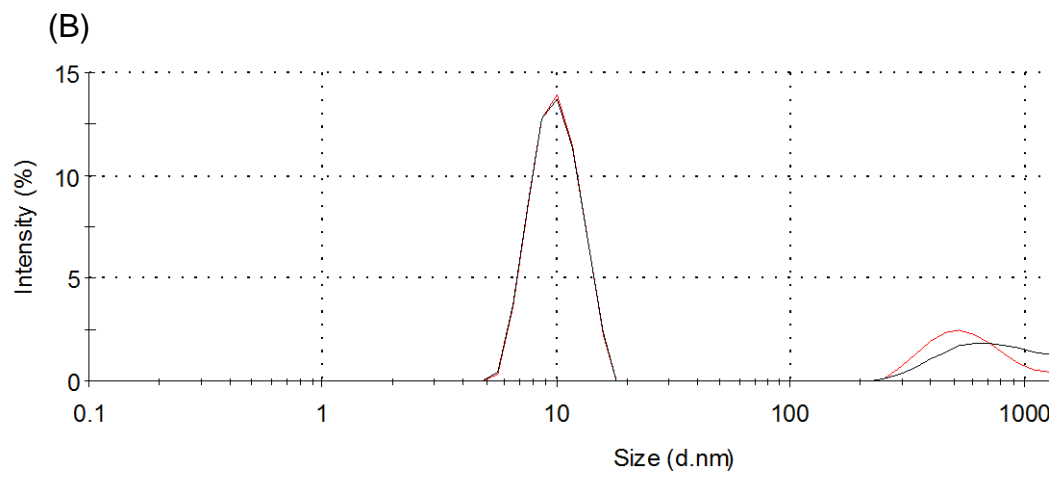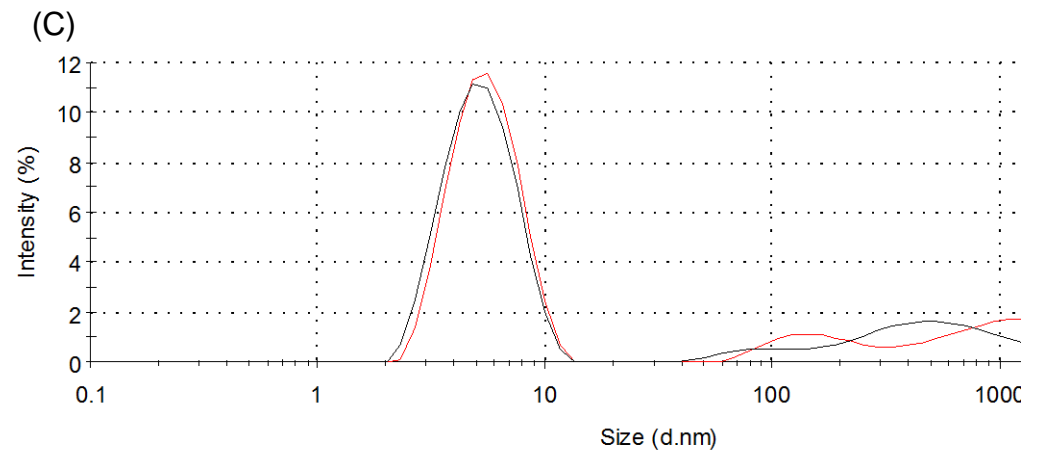



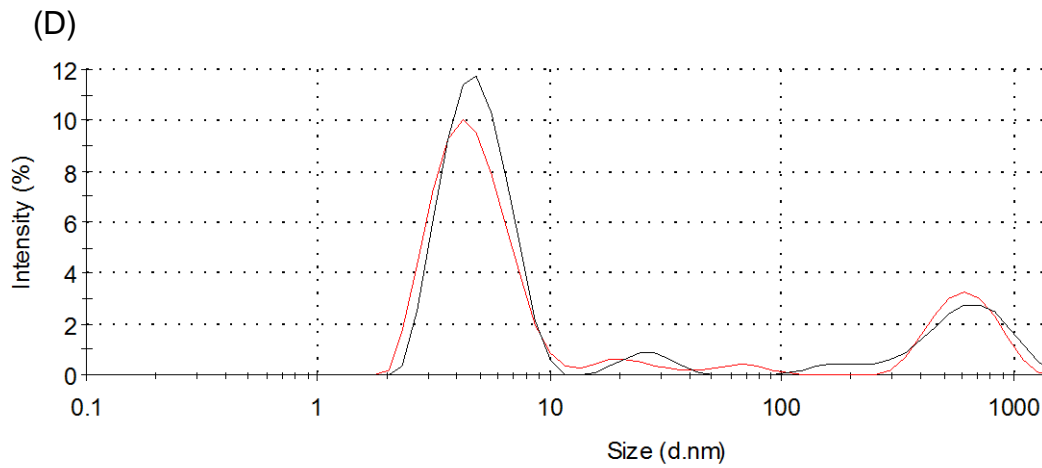

FIGURE S5: (A) Dynamic Light Scattering (DLS) data measured on a Zetasizer Nano for freshly reconstituted BSA solutions at two different time points (day 1: black, day 2: red) at 500 mg/mL and (A) pH 3, (B) pH 4, (C) pH 5, and (D) pH 7.4. Data are unreliable beyond 1  $\mu\text{m}$ .

## Supporting References

1. Peters, T. 1995. All About Albumin: Biochemistry, Genetics, and Medical Applications. Elsevier, New York.
2. Sharma, V, A. Jaishankar, Y.C. Wang, and G.H. McKinley. 2011. Rheology of Globular Proteins: Apparent Yield Stress and Interfacial Viscoelasticity of Bovine Serum Albumin Solutions. *Soft Matter*. 7:5150-5160
3. Brownsey, G.J., T.R. Noel, R. Parker, and S.G. Ring. 2003. The Glass Transition Behavior of the Globular Protein Bovine Serum Albumin. *Biophys. J.* 85:3943-3950.
4. Tanford, C., and J.G. Buzzell. 1956. The Viscosity of Aqueous Solutions of Bovine Serum Albumin between pH 4.3 and 10.5. *J. Phys. Chem.* 60:225-231.
5. Tanford, C, J.G. Buzzell, D.G. Rands, and S.A. Swanson. 1995. The Reversible Expansion of Bovine Serum Albumin in Acid Solutions. *J. Phys. Chem.* 77:6421-6427.
6. Saluja, A., and D.S. Kalonia. 2005. Application of Ultrasonic Shear Rheometer to Characterize Rheological Properties of High Protein Concentration Solutions at Microliter Volume. *J. Pharm. Sci.* 94:1161-1168.
7. Gaigalas, A.K., V. Reipa, J.B. Hubbard, J. Edwards, and J. Douglas. 1995. A Non-Perturbative Relation between The Mutual Diffusion Coefficient, Suspension Viscosity, and Osmotic Compressibility: Application to Concentrated Protein Solutions. *Chem. Eng. Sci.* 50:1107-1114.
8. Monkos, K. 1996. Viscosity of Bovine Serum Albumin Aqueous Solutions as a Function of Temperature and Concentration. *Int. J. Biol. Macromol.* 18:61-68.
9. Sun, S.F. 1969. The pH Dependence of the Reduced Viscosity of Modified Serum Albumins. *Arch. Biochem. Biophys.* 129:411-415.
10. Lee, J., and A. Tripathi. 2005. Intrinsic Viscosity of Polymers and Biopolymers Measured by Microchip. *Anal. Chem.* 77:7137-7147.
11. Heinen, M., F. Zanini, F. Roosen-Runge, D. Fedunova, and F. Zhang, M. Hennig, T. Seydel, R. Schweins, M. Sztucki, M. Antalik, F. Schreiber, and G. Nägele. 2012. Viscosity and Diffusion: Crowding and Salt Effects in Protein Solutions. *Soft Matter*. 8:1404-1419.
12. Giordano, R., G. Maisano, F. Mallamace, N. Micali, and F. Wanderlingh. 1981. Structural Properties of Macromolecular Solutions. *J. Chem. Phys.*, 75:4770-4775.
13. Jachimska, B., M. Wasilewska, and Z. Adamczyk. 2008. Characterization of Globular Protein Solutions by Dynamic Light Scattering, Electrophoretic Mobility, and Viscosity Measurements. *Langmuir*, 24:6866-6872.
14. Curvale, R., M. Masuelli, and A.P. Padilla. 2008. *Int. J. Biol. Macromol.*, 42:133-137.
15. Yadav, S., S.J. Shire, and D.S. Kalonia. 2011. Viscosity Analysis of High Concentration Bovine Serum Albumin Aqueous Solutions. *Pharm. Res.* 28:1973-1983.
16. Oates, K.M.N., W.E. Krause, R.L. Jones, and R.H. Colby. 2006. Rheopexy of Synovial Fluid and Protein Aggregation. *J.R. Soc. Interface* 3:167-174.
17. Bloomfield, V. 1969. The Structure of Bovine Serum Albumin at Low pH. *Biochem.* 5:684-688.
18. Bowen, W.R., and P.M. Williams. 2001. Prediction of the Rate of Cross-flow Ultrafiltration of Colloids with Concentration-dependent Diffusion Coefficient and Viscosity – Theory and Experiment. *Chem. Eng. Sci.* 56:3083-3099.

19. Chikazumi, N., and T. Ohta. 1991. Estimation of Hydrodynamic Volume of Proteins using High-performance Size-exclusion Chromatography and Intrinsic Viscosity Measurement: An Attempt at Universal Calibration. *J. Liq. Chromat.* 14:406-413
20. Ikeda, S., and K. Nishinari. 2001. On Solid-like Rheological Behaviors of Globular Protein Solutions. *Food Hydrocoll.* 15:401-406
